# Supplementary material
Source: Springer Nature journal article supplement (https://www.springermedizin.de/resource/supplementary/12957_2011_971_MOESM6_ESM.pdf/9562098)

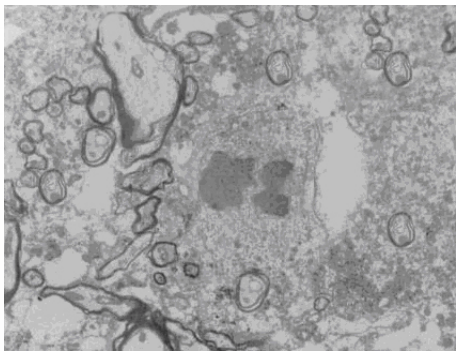

a

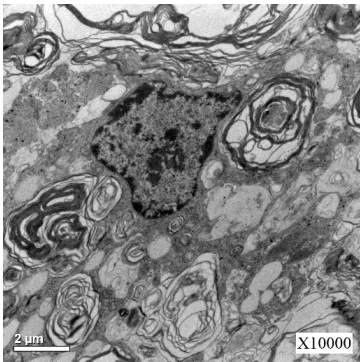

b

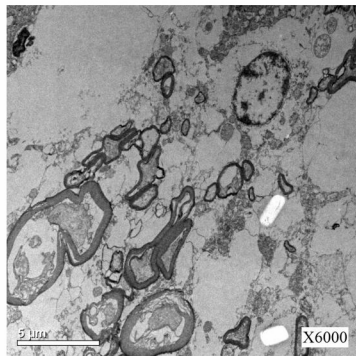

c

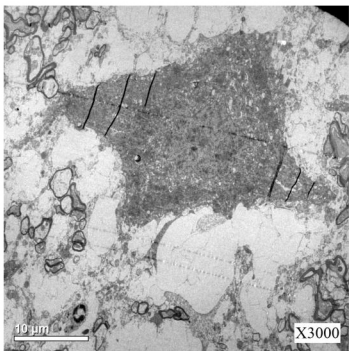

d

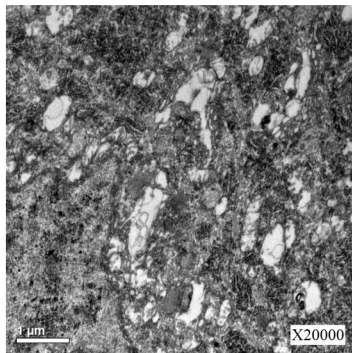

e

Supplement: MOESM6 [file 9562098]
